# Supplementary material for: Improved photoelectrochemical water oxidation kinetics using a TiO2 nanorod array photoanode decorated with graphene oxide in a neutral pH solution
Source: Royal Society of Chemistry journal article supplement (doi:10.1039/c4cp05793g), 2015-01-01
Supplement: c4cp05793g1.pdf [file c4cp05793g1.pdf]

## Supporting Information for

### Improved Photoelectrochemical Water Oxidation Kinetics Using TiO<sub>2</sub> Nanorod Arrays Photoanode Decorated with Graphene Oxide in a Neutral pH Solution

Sang Youn Chae<sup>a,b</sup>, Pitchaimuthu Sudhagar<sup>c</sup>, Akira Fujishima<sup>c</sup>, Yun Jeong Hwang<sup>a,d\*</sup>, Oh-Shim Joo<sup>a,d</sup>

<sup>a</sup> Clean Energy Research Center, Korea Institute of Science and Technology (KIST), 39-1 Hawolgoek Dong, Seoul 136-791, Republic of Korea

<sup>b</sup> Department of Chemistry, Korea University, Seoul 136-713, Republic of Korea

<sup>c</sup> Photocatalysis International Research Center (PIRC), Research Institute for Science and Technology, Tokyo University of Science, 2641 Yamazaki, Noda, Chiba 278-8510, Japan

<sup>d</sup> Korea University of Science and Technology, 176 Gajung-dong, 217 Gajungro Yuseong-gu, Daejeon 305-350, Republic of Korea

\* Corresponding author. Tel: +82-2-958-5227; Fax: 82-2-958-5809

E-mail address: yjhwang@kist.re.kr

#### Supplementary Figures

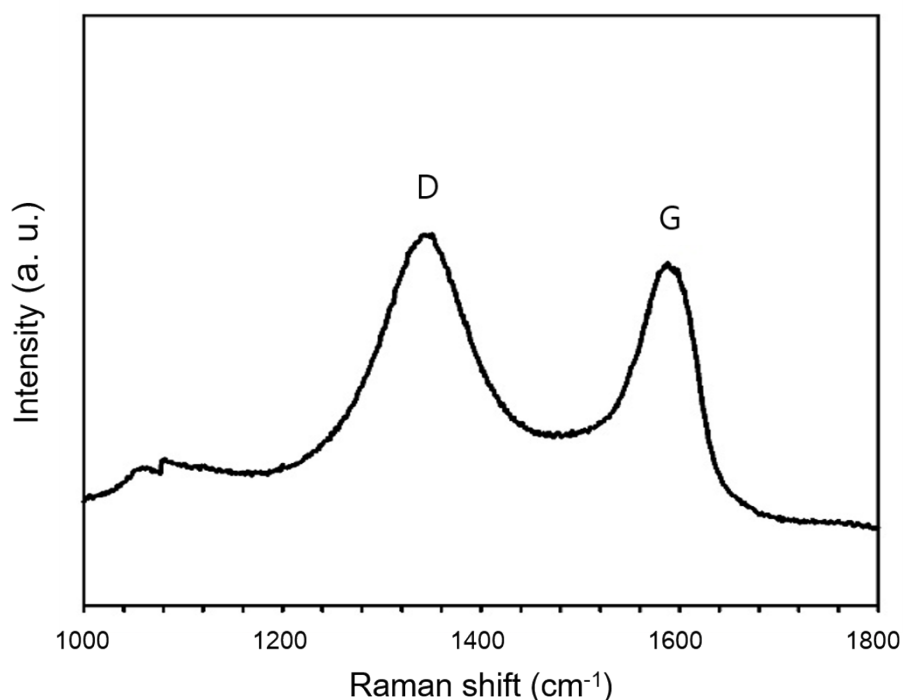

Figure S1. Raman spectrum of the prepared graphene oxide. D and G indicate D band and G band of graphene oxide.

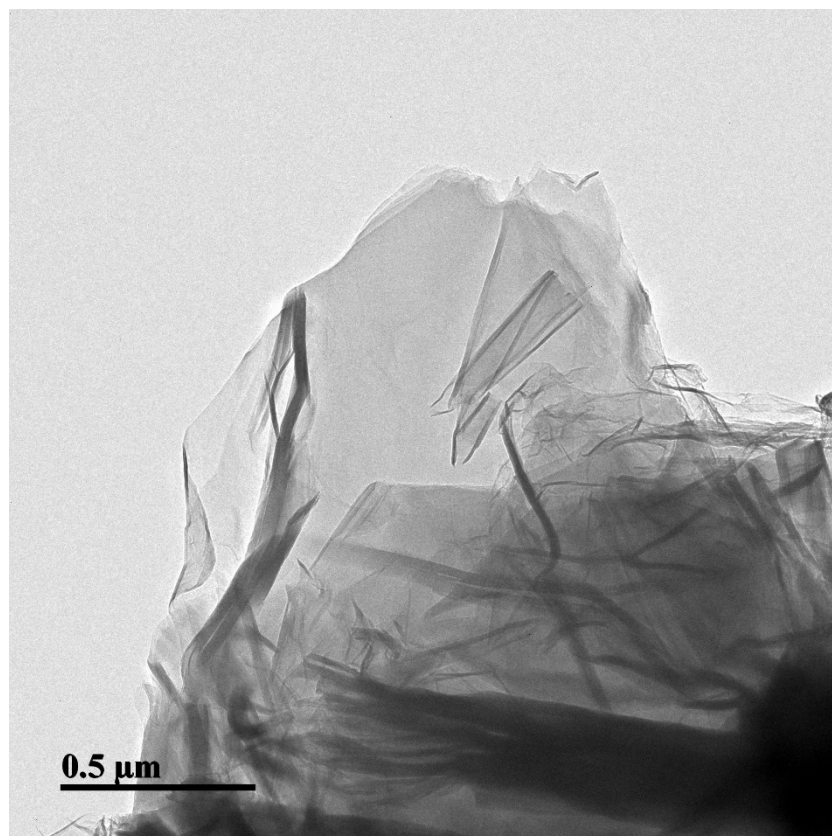

Figure S2. TEM image of the synthesized graphene oxide.

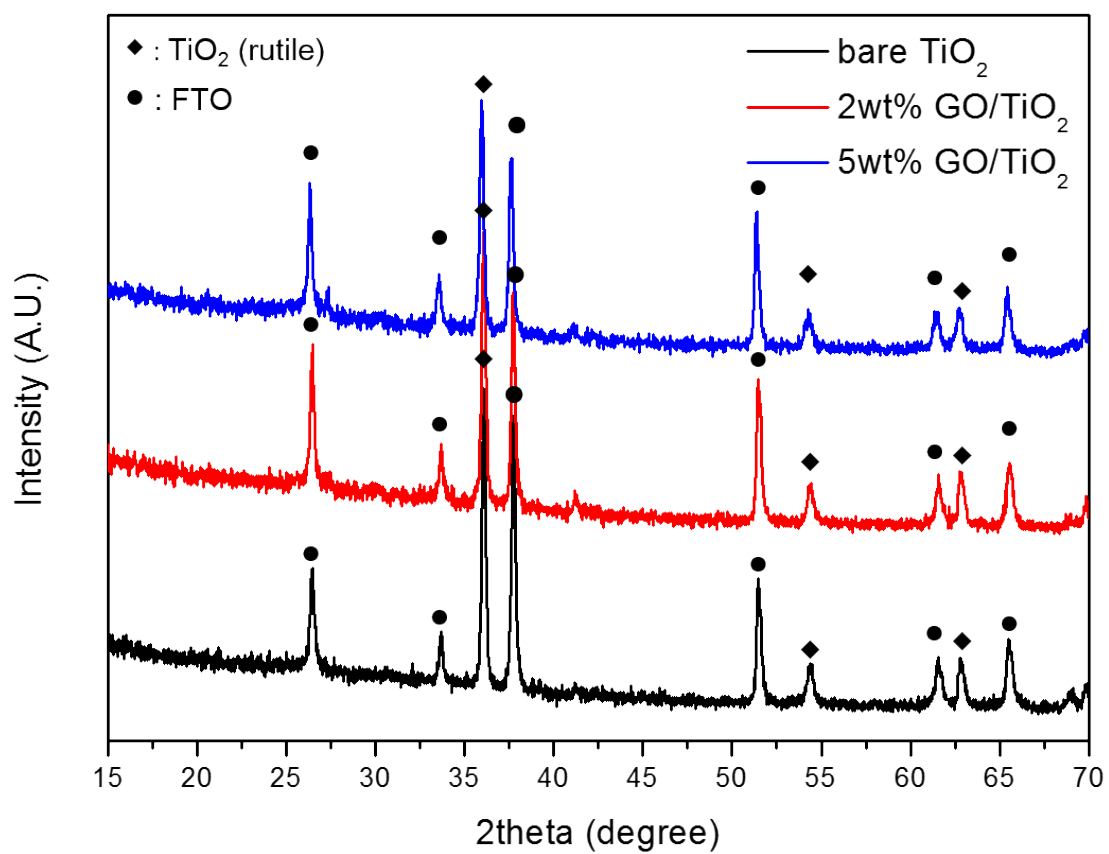

Figure S3. XRD pattern of bare TiO<sub>2</sub>, 2 wt% GO coated TiO<sub>2</sub>, and 5 wt% GO coated TiO<sub>2</sub> nanorod on FTO glass.

(a) Basic condition

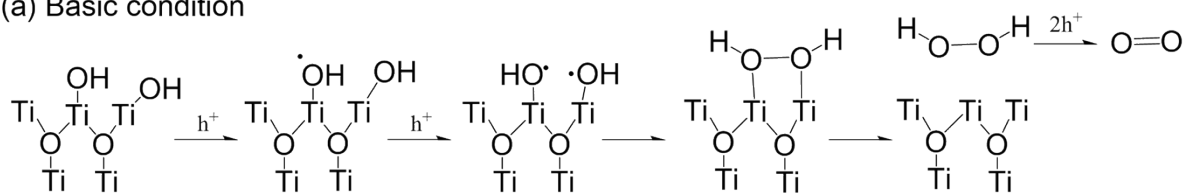

(b) Neutral condition

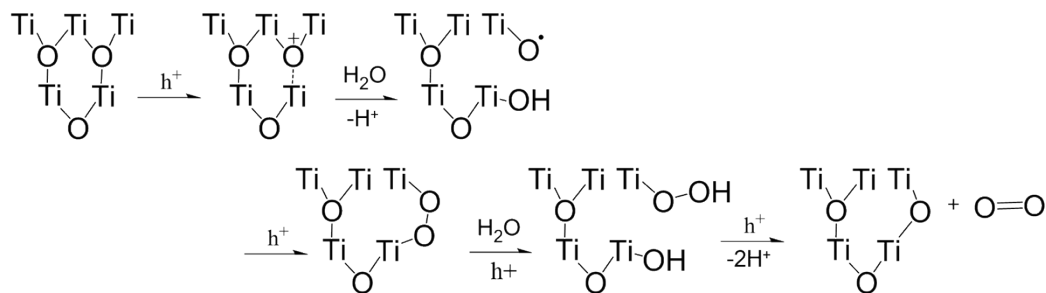

Scheme S1. Proposed water oxidation mechanisms showing the involving chemical species (a) in a basic, and (b) in a neutral pH electrolyte adapted by the previous reports<sup>1,2</sup>.

#### Reference

1. M. R. Hoffmann, S. T. Martin, W. Y. Choi and D. W. Bahnemann, *Chem. Rev.*, 1995, 95, 69-96.
2. R. Nakamura, T. Okamura, N. Ohashi, A. Imanishi and Y. Nakato, *J. Am. Chem. Soc.*, 2005, 127, 12975-12983.
